# Supplementary material for: Efficacy and Safety of Weekly Alendronate Plus Vitamin D3 5600 IU versus Weekly Alendronate Alone in Korean Osteoporotic Women: 16-Week Randomized Trial
Source: PubMed Central journal article supplement — Yonsei Med J. 2014 Apr 1;55(3):715–24. doi: 10.3349/ymj.2014.55.3.715 (PMC3990072; doi:10.3349/ymj.2014.55.3.715), 2014-04-01
Supplement: ymj-55-715-s001.pdf [file ymj-55-715-s001.pdf]

**Supplementary Table 1. Proportion of Patients with Vitamin D Insufficiency**

| Vitamin D insufficiency in pre-treatment (baseline) | Vitamin D insufficiency in post-treatment | Wk 8              |             |               |                     | Wk 16             |             |               |                     |
|-----------------------------------------------------|-------------------------------------------|-------------------|-------------|---------------|---------------------|-------------------|-------------|---------------|---------------------|
|                                                     |                                           | ALN/D5600 (n=136) | ALN (n=132) | Total (n=268) | Difference [95% CI] | ALN/D5600 (n=136) | ALN (n=132) | Total (n=268) | Difference [95% CI] |
| Yes                                                 | Yes, n (%)                                | 1 (2.17)          | 23 (53.49)  | 24 (26.97)    | -51.31 [-66.81~     | 2 (4.08)          | 23 (52.27)  | 25 (26.88)    | -48.19 [-63.96~     |
|                                                     | No, n (%)                                 | 45 (97.83)        | 20 (46.51)  | 65 (73.03)    | -35.82]             | 47 (95.92)        | 21 (47.73)  | 68 (73.12)    | -32.43]             |
| No                                                  | Yes, n (%)                                | 0 (0.00)          | 14 (16.28)  | 14 (8.09)     | -16.28 [-24.08~     | 0 (0.00)          | 32 (36.36)  | 32 (18.29)    | -36.36 [-46.41~     |
|                                                     | No, n (%)                                 | 87 (100.00)       | 72 (83.72)  | 159 (91.91)   | -8.48]              | 87 (100.00)       | 56 (63.64)  | 143 (81.71)   | -26.31]             |

ALN/D5600, alendronate containing 5600 IU of vitamin D<sub>3</sub>; ALN, alendronate; CI, confidence interval.

Vitamin D insufficiency [Yes: 25(OH)D <15 ng/mL, No: 25(OH)D ≥15 ng/mL]. Missing data at week 8-ALN/D5600 (3 subjects), ALN (3 subjects).
