# Supplementary material for: Efficacy and Safety of Weekly Alendronate Plus Vitamin D3 5600 IU versus Weekly Alendronate Alone in Korean Osteoporotic Women: 16-Week Randomized Trial
Source: PubMed Central journal article supplement — Yonsei Med J. 2014 Apr 1;55(3):715–24. doi: 10.3349/ymj.2014.55.3.715 (PMC3990072; doi:10.3349/ymj.2014.55.3.715), 2014-04-01
Supplement: ymj-55-715-s002.pdf [file ymj-55-715-s002.pdf]

**Supplementary Table 2. Multiple Regression Analysis for Increment of Serum 25(OH)D**

| Variable                           | Parameter estimate | Standard error |
|------------------------------------|--------------------|----------------|
| Group (1: ALN/D5600 versus 0: ALN) | 13.11 <sup>†</sup> | 0.66           |
| 25(OH)D value at baseline          | -0.6 <sup>†</sup>  | 0.05           |
| Recruit season                     |                    |                |
| 1: spring versus 0: autumn         | 4.3 <sup>†</sup>   | 1.04           |
| 1: summer versus 0: autumn         | 2.77 <sup>†</sup>  | 0.94           |

ALN/D5600, alendronate containing 5600 IU of vitamin D<sub>3</sub>; ALN, alendronate.

Model  $p$ -value <0.0001, R-square=0.6892.

<sup>†</sup> $p$ <0.0001.
