# Supplementary material for: Efficacy and Safety of Weekly Alendronate Plus Vitamin D3 5600 IU versus Weekly Alendronate Alone in Korean Osteoporotic Women: 16-Week Randomized Trial
Source: PubMed Central journal article supplement — Yonsei Med J. 2014 Apr 1;55(3):715–24. doi: 10.3349/ymj.2014.55.3.715 (PMC3990072; doi:10.3349/ymj.2014.55.3.715), 2014-04-01
Supplement: ymj-55-715-s003.pdf [file ymj-55-715-s003.pdf]

**Supplementary Table 3. Serum PTH**

| Serum PTH (pg/mL)                        | ALN/D5600 (n=136) |                     | ALN (n=132) |                        | p value             |
|------------------------------------------|-------------------|---------------------|-------------|------------------------|---------------------|
|                                          | n                 | Mean±SD             | n           | Mean±SD                |                     |
| Baseline                                 | 136               | 25.25±10.69         | 132         | 23.37±11.23            | 0.1605 <sup>†</sup> |
| Wk 16                                    | 129               | 24.30±12.05         | 124         | 27.41±13.77            |                     |
| Change from baseline at wk 16            | 129               | -0.89±11.55         | 124         | 4.28±10.72             | 0.0003 <sup>†</sup> |
| p value                                  |                   | 0.3856 <sup>‡</sup> |             | <0.0001 <sup>‡</sup>   |                     |
| LS mean <sup>1</sup> [95% CI]            |                   | -0.57 [-2.43, 1.28] |             | 3.95 [2.06, 5.85]      | 0.0009*             |
| Difference of LS mean [95% CI]           |                   |                     |             | -4.53 [-7.18, -1.87]   |                     |
| Percentage change from baseline at wk 16 | 129               | 5.67±54.34          | 124         | 32.58±84.31            | 0.0030 <sup>†</sup> |
| p value                                  |                   | 0.2379 <sup>‡</sup> |             | <0.0001 <sup>‡</sup>   |                     |
| LS mean <sup>2</sup> [95% CI]            |                   | 8.17 [-3.24, 19.58] |             | 29.98 [18.34, 41.62]   | 0.0091*             |
| Difference of LS mean [95% CI]           |                   |                     |             | -21.81 [-38.15, -5.47] |                     |

ALN/D5600, alendronate containing 5600 IU of vitamin D<sub>3</sub>; ALN, alendronate; CI, confidence interval; PTH, parathyroid hormone; LS, least squares; ANCOVA, analysis of covariance.

LS mean<sup>1</sup> : mean of serum PTH changes adjusted serum PTH level at baseline. LS mean<sup>2</sup> : mean of serum PTH percentage changes adjusted serum PTH level at baseline.

\*ANCOVA.

<sup>†</sup>Unpaired t-test.

<sup>‡</sup>Paired t-test.
